# Supplementary material
Source: PubMed Central journal article supplement (PMC5269454)
Supplement: NIHMS833228-supplement-Graphic_Abstract.pdf [file NIHMS833228-supplement-Graphic_Abstract.pdf]

**Rabbits on high-fat diet develop atherosclerosis**

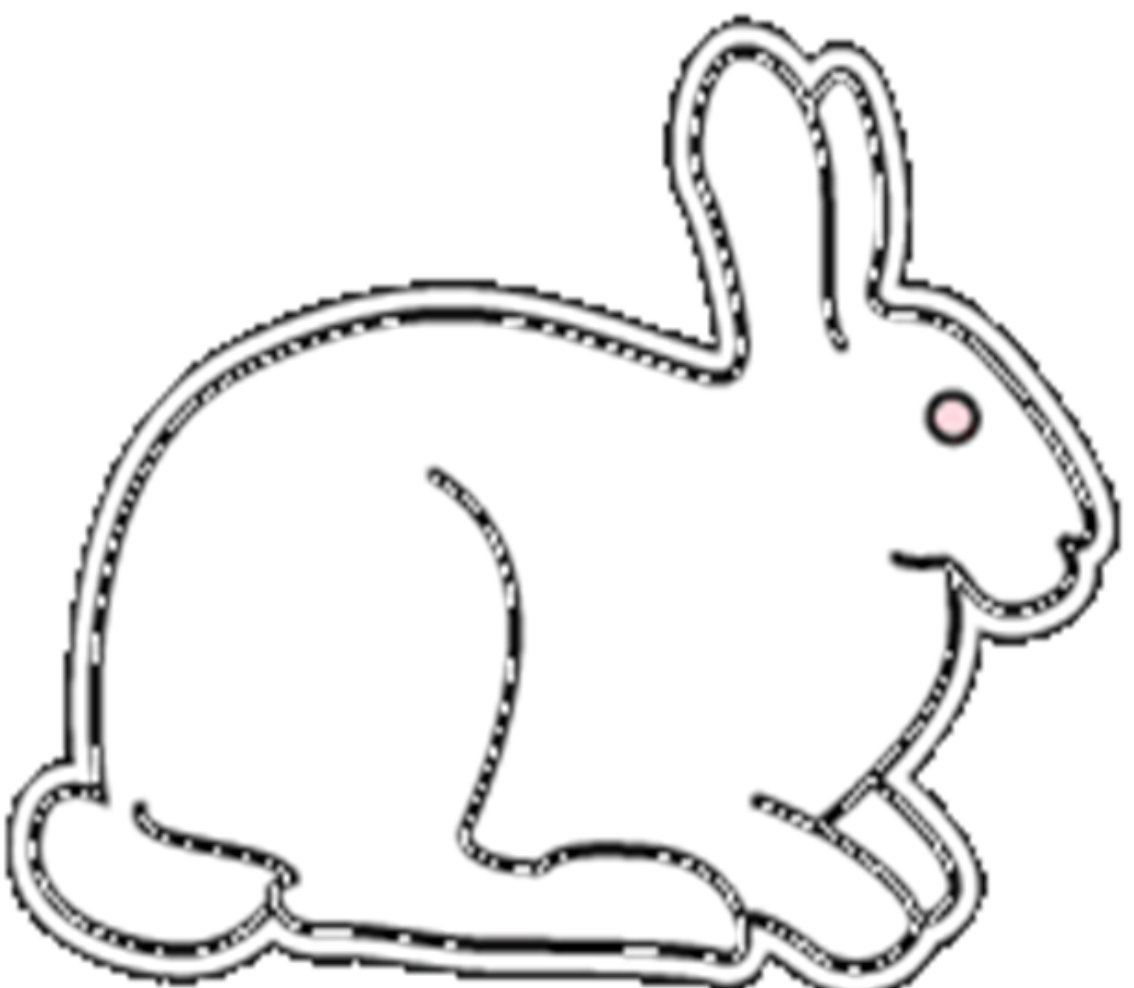

**6 mo.**

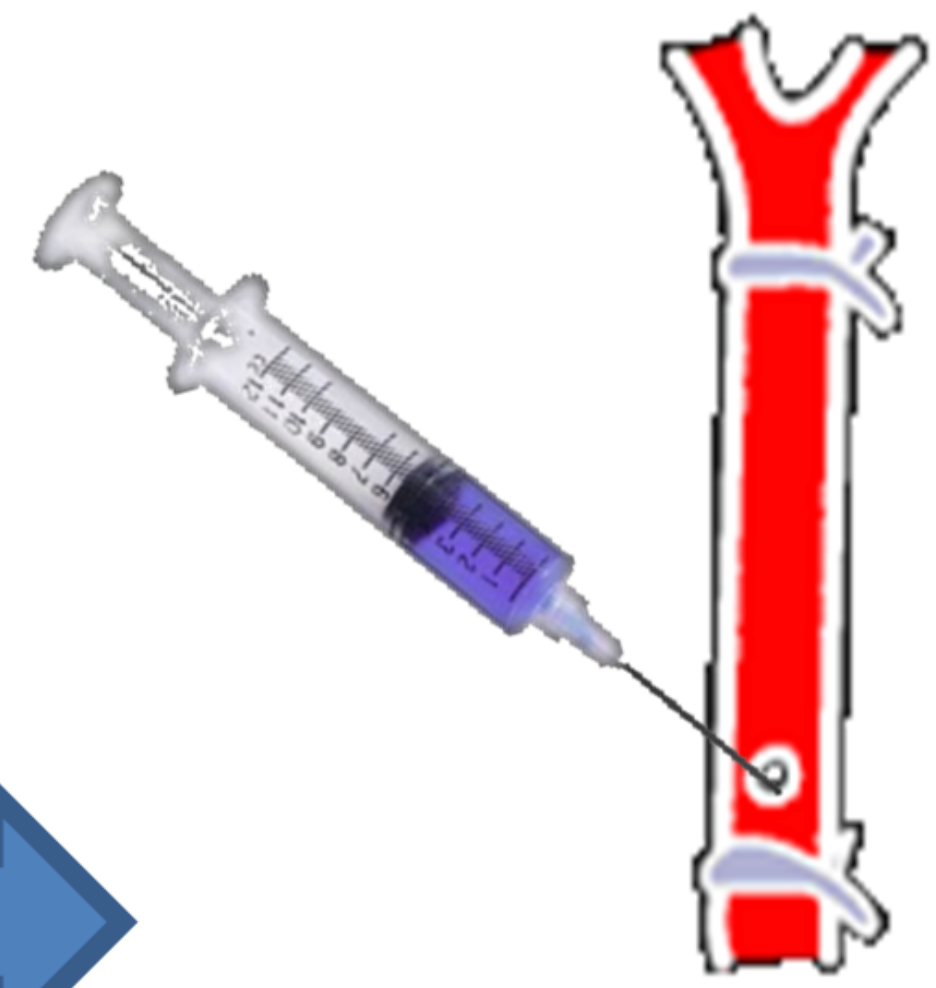

**Infusion of a viral vector expressing apo A-I into carotid artery**

**Persistent expression and release of apo A-I from endothelium**

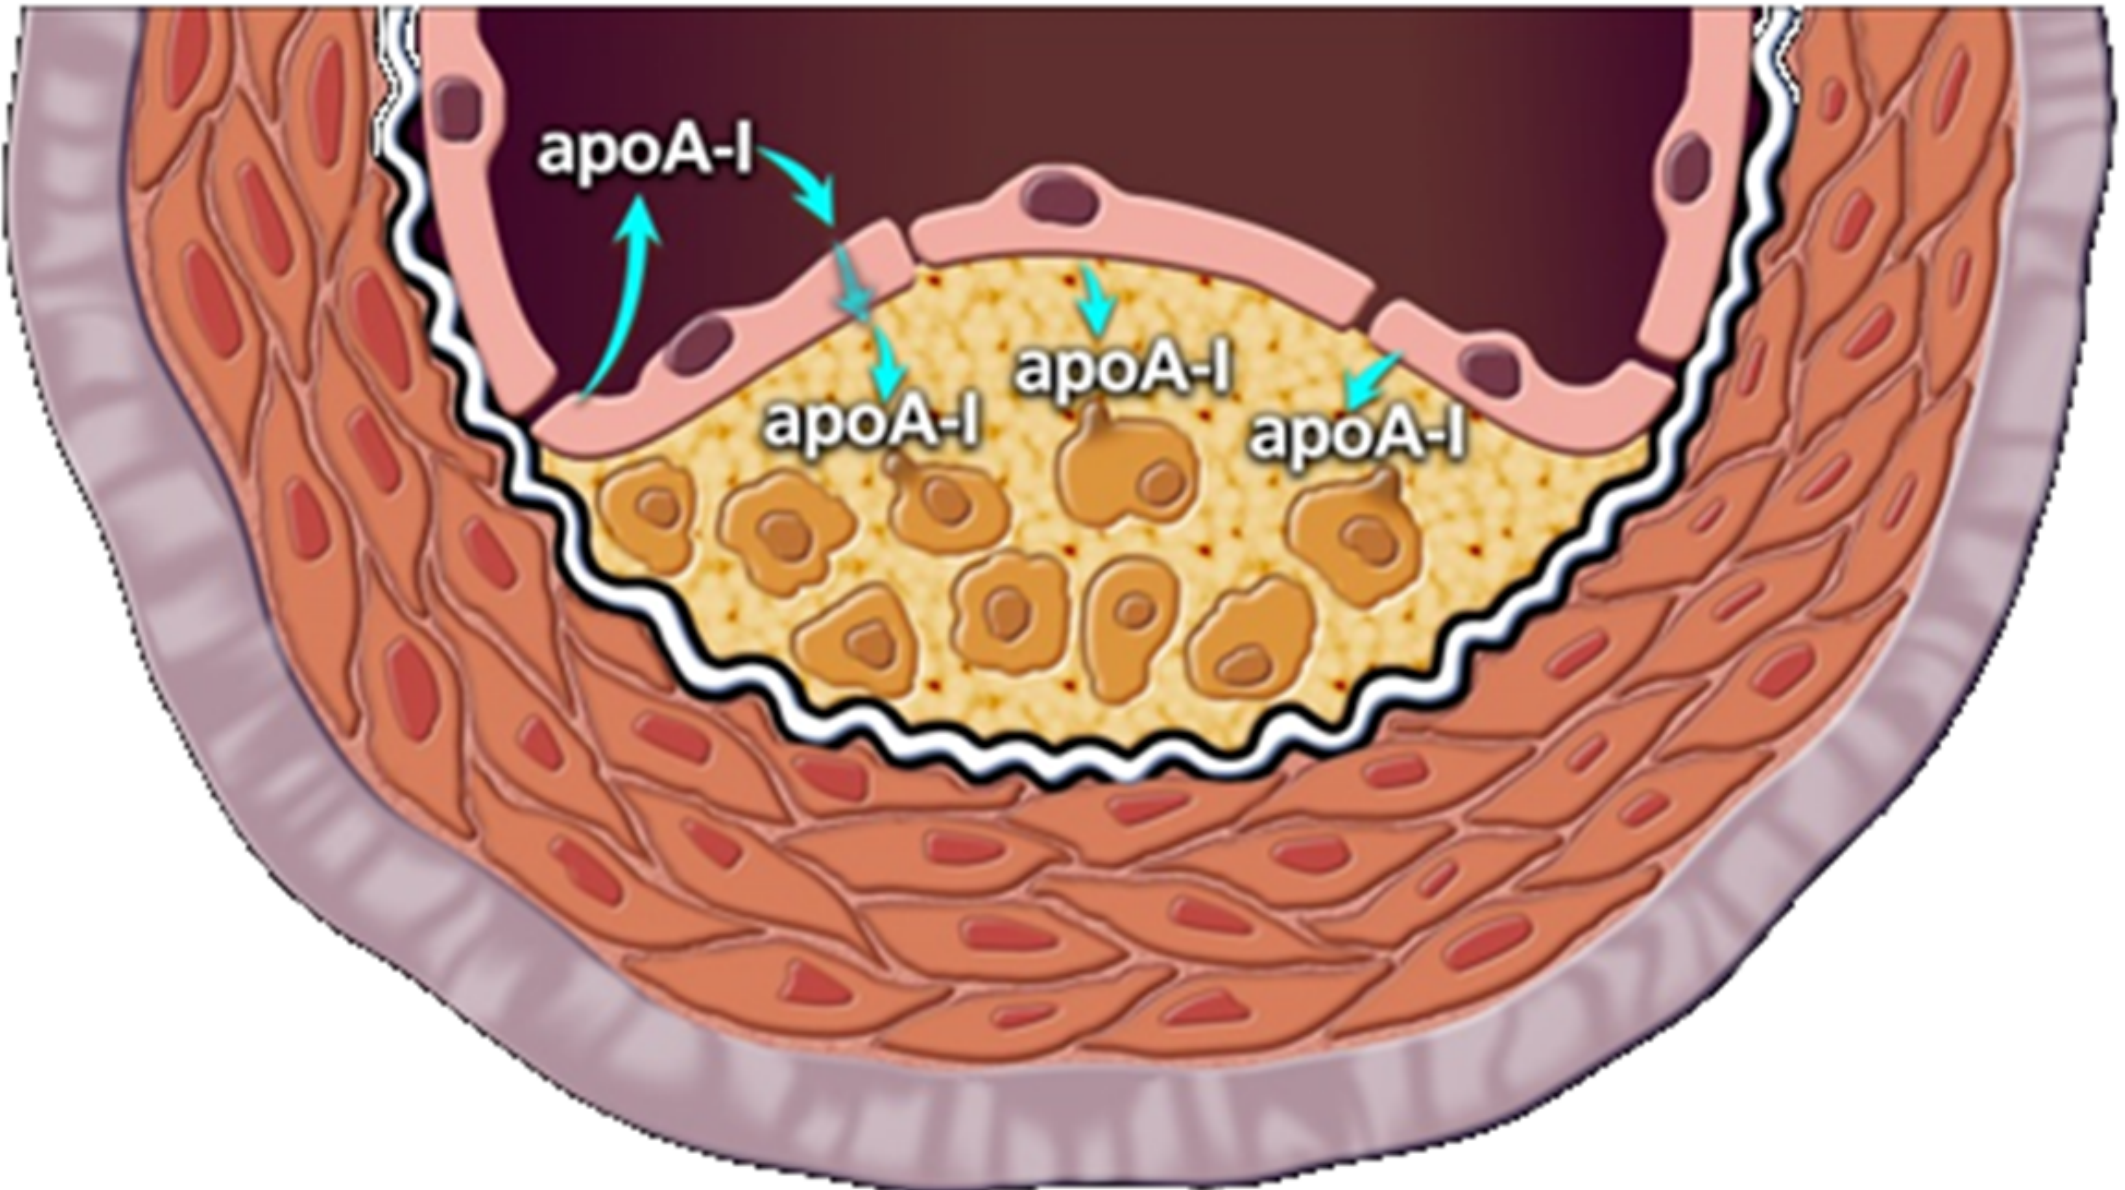

**7 wk**

- **Significant reduction of VCAM-1 adhesion molecule**
- **Non-significant trends toward atherosclerosis regression**
- **Significant reductions in lesion size, lipid content, and adhesion molecules in rabbits with small-to-moderate-sized lesions**
